# Supplementary material for: Additive-Manufactured Gyroid Scaffolds of Magnesium Oxide, Phosphate Glass Fiber and Polylactic Acid Composite for Bone Tissue Engineering
Source: PubMed Central journal article supplement (PMC7830155; doi:10.3390/polym13020270), 2021-01-15
Supplement: polymers-13-00270-s001.pdf [file polymers-13-00270-s001.pdf]

# Additive-manufactured Gyroid Scaffolds of Magnesium Oxide, Phosphate Glass Fiber and Polylactic acid Composite for Bone Tissue Engineering

Lizhe He <sup>1</sup>, Xiaoling Liu <sup>1,2,3,\*</sup> and Chris Rudd <sup>4</sup>

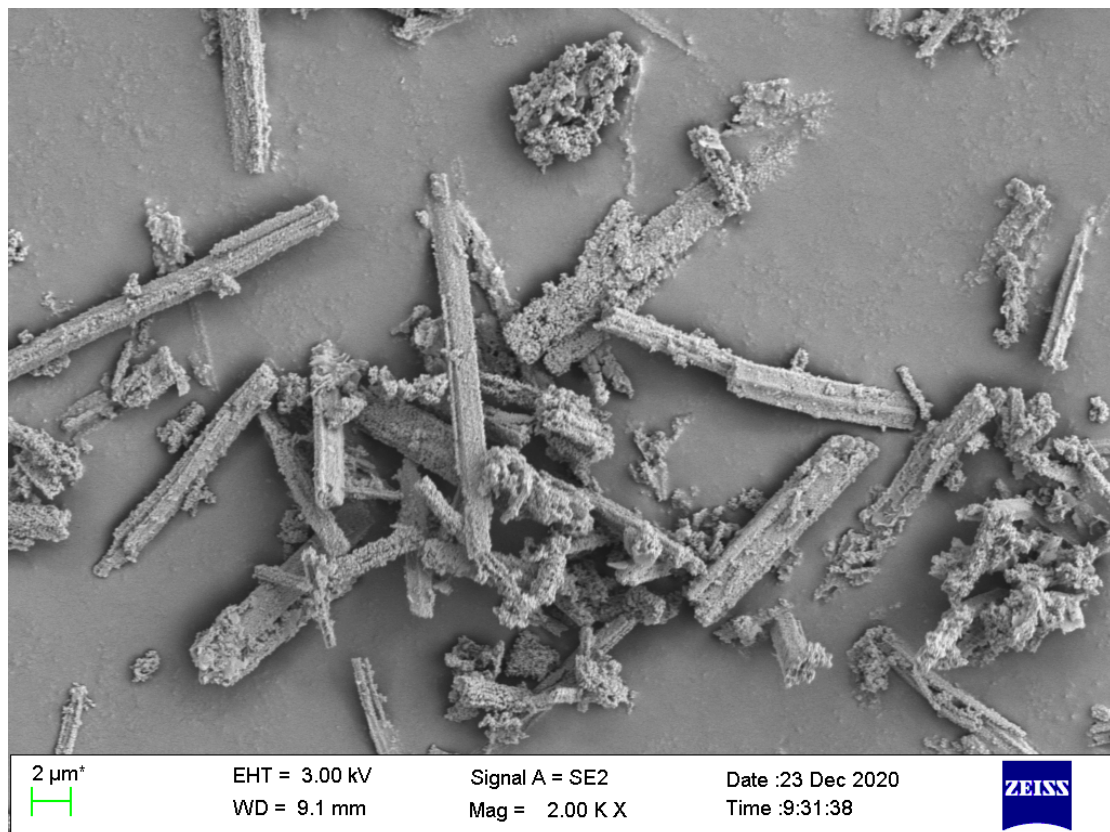

Figure S1. SEM image of MgO rod-like microparticles.

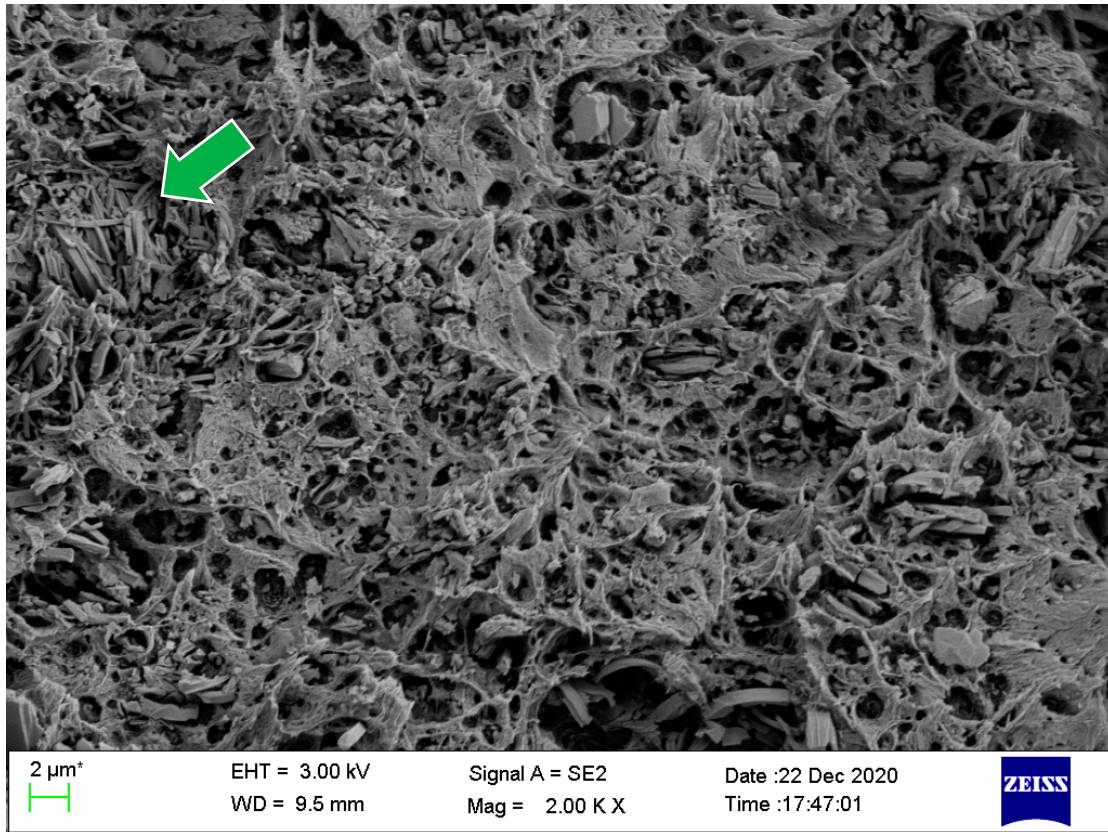

Figure S2. Freeze-fractured surface of a MgO/PLA composite scaffold after 14 days of immersion in Tris-HCl buffer. The arrow points at the rod-like MgO nanoparticles

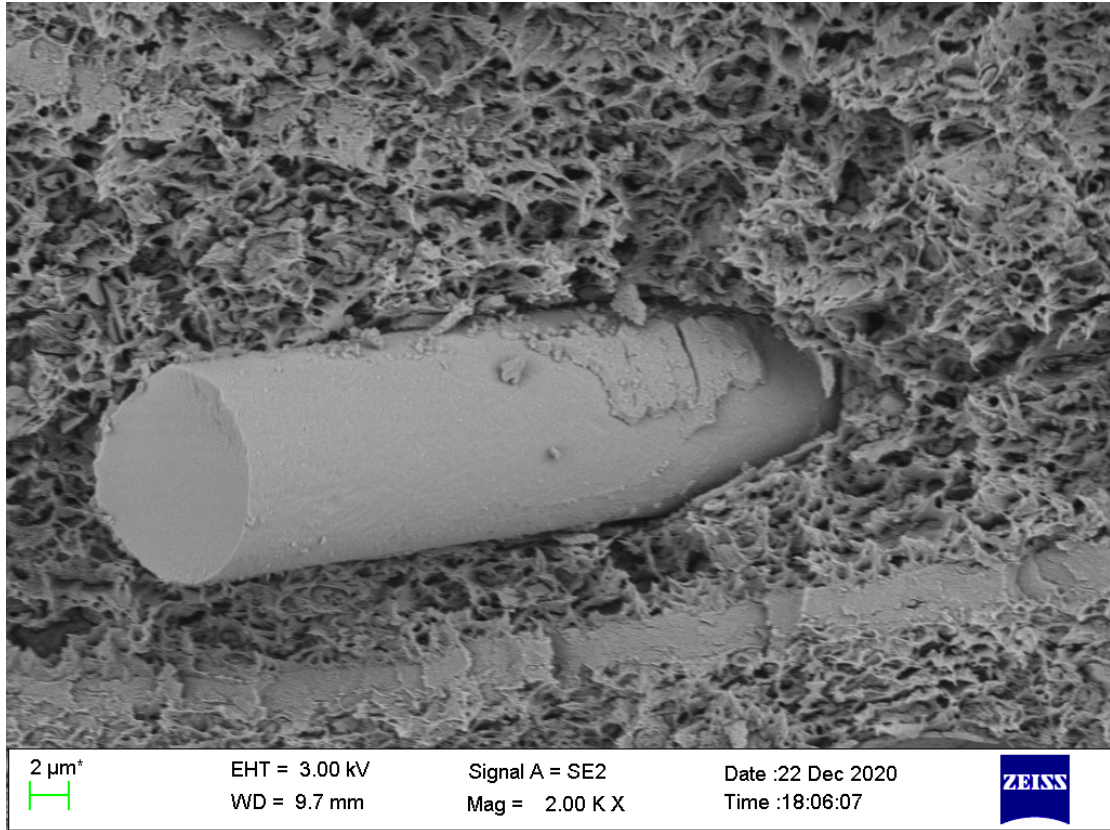

Figure S3. Freeze-fractured surface of a (MgO+PGF)/PLA composite scaffold after 14 days of immersion in Tris-HCl buffer.

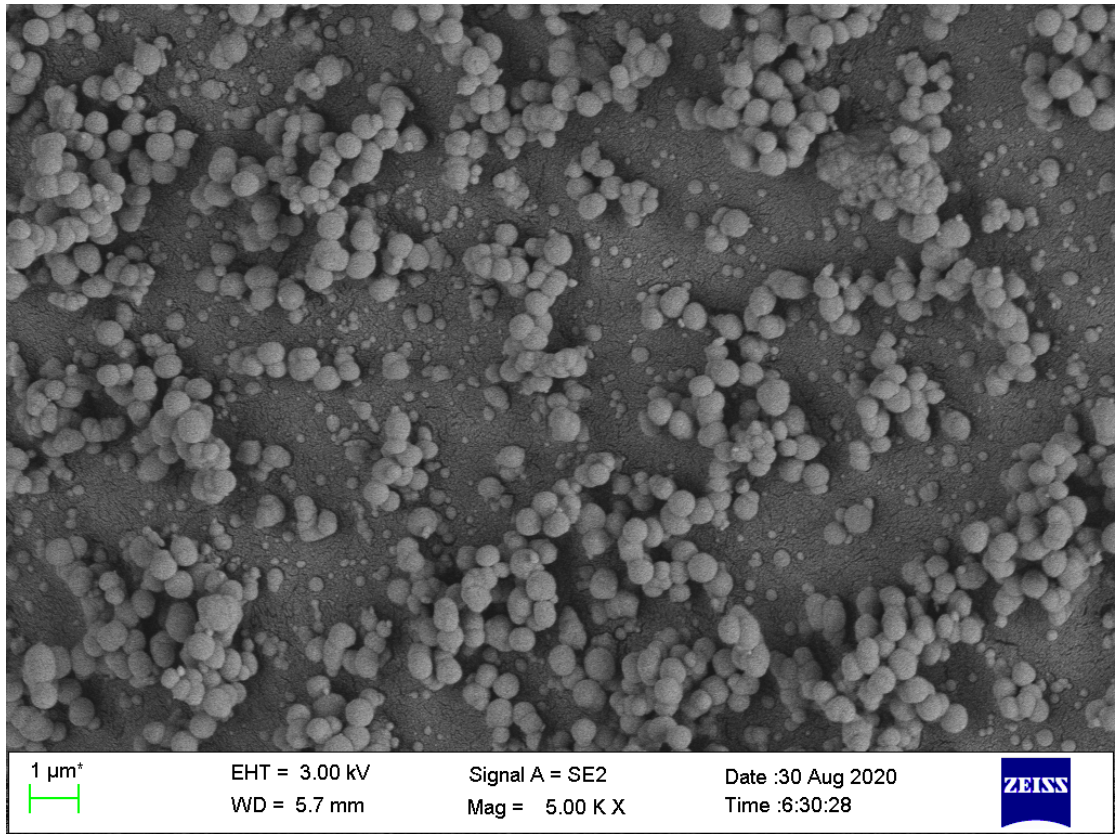

Figure S4. Top surface of a PGF/PLA composite scaffold after 14 days of immersion in Tris-HCl buffer (under a higher magnification of 5000x).
